# Supplementary material for: Au-Ag Alloy Nanoshuttle Mediated Surface Plasmon Coupling for Enhanced Fluorescence Imaging
Source: MDPI journal article supplement (doi:10.3390/bios12111014), 2022-11-13
Supplement: s1 [file s1]

# Au-Ag Alloy Nanoshuttle Mediated Surface Plasmon Coupling for Enhanced Fluorescence Imaging

Kai-Xin Xie <sup>1,2,†</sup>, Zhao Li <sup>2,†</sup>, Jia-Hua Fang <sup>2</sup>, Shuo-Hui Cao <sup>2,3,\*</sup> and Yao-Qun Li <sup>2,\*</sup>

<sup>1</sup> College of Chemistry and Materials, Taiyuan Normal University, Jinzhong 030619, China

<sup>2</sup> Department of Chemistry and the MOE Key Laboratory of Spectrochemical Analysis & Instrumentation, College of Chemistry and Chemical Engineering, Xiamen University, Xiamen 361005, China

<sup>3</sup> Department of Electronic Science, Xiamen University, Xiamen 361005, China

\* Correspondence: shuohuicao@xmu.edu.cn (S.-H.C.); yaoqunli@xmu.edu.cn (Y.-Q.L.)

† These authors contributed equally to this work.

## 1. The Synthesized Process of Au-Ag NSs.

The synthesis process mainly refers to a published article by Bai et al. in 2014 (ACS Appl. Mater. Interfaces, 2014, 6, 3331-3340), and the synthesized process is shown below. Original Au NRs were prepared by a seed-mediated method developed by Ye et al. in 2013 (Nano Lett., 2013, 13, 765-771). A stable pH of 8.5 was obtained by mixing 5 mL of purified Au NRs (centrifugation twice at 10,000 rcf for 15 min) in 0.1 M hexadecyltrimethylammonium bromide, 5 mL of 0.2 M glycine acid and 30  $\mu$ L of 2 M NaOH solutions. Then, 40  $\mu$ L of HAuCl<sub>4</sub> (25 mM) and 0.2 mL of AgNO<sub>3</sub> (10 mM) were added under vigorous stirring and incubated at 27 °C. Finally, 0.2 mL of ascorbic acid solution (0.1 M) was added to the solution and stirred for 30 s, and then the whole solution was aged for 1 h. The nanostructures were centrifuged at 7000 rcf for 10 min and dispersed in deionized water.

## 2. The Extinction Spectrum and XRD Patterns for Au-Ag NSs

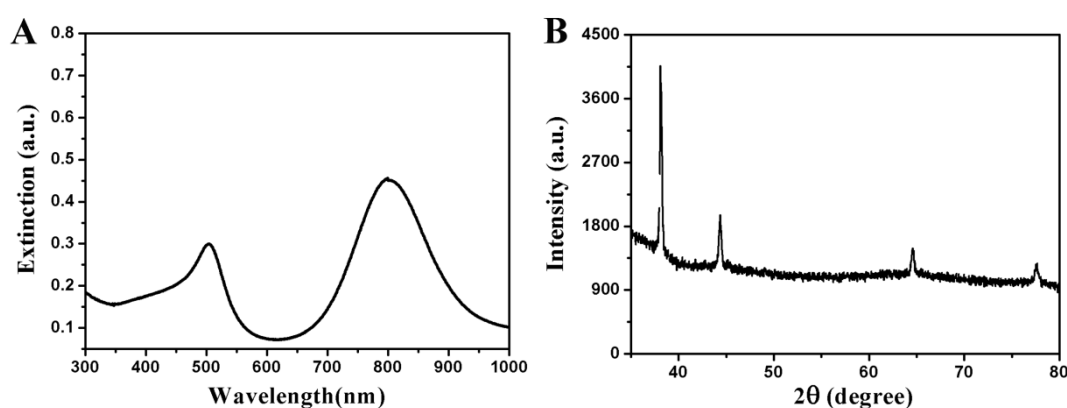

**Figure S1.** (A) The extinction spectrum and (B) XRD patterns for Au-Ag NSs.

### 3. The Excitation Angular Distribution of RhB-PMMA Fluorophore Layer without NSs

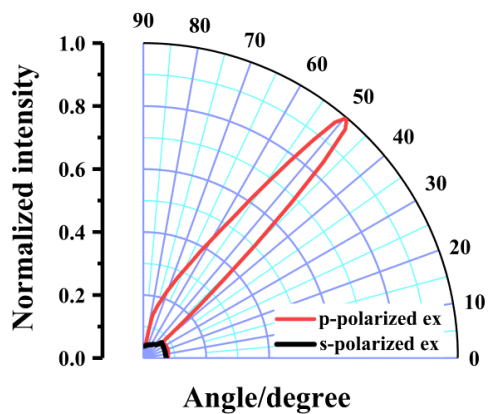

**Figure S2.** The excitation angular distribution of RhB-PMMA fluorophore layer without NPs from different polarization.

### 4. The Calculated SPR Curve

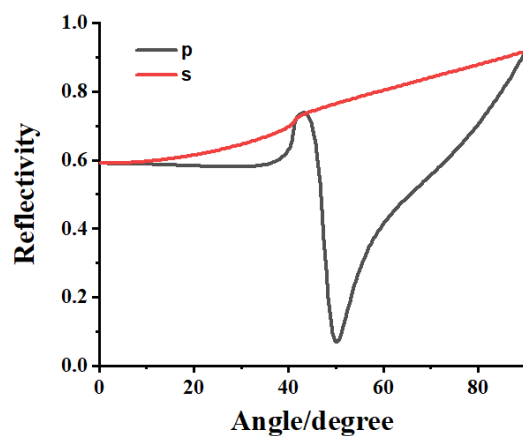

**Figure S3.** The calculated SPR curve for 561 nm with fluorophore layer about 20 nm.

### 5. The TEM Image and Mapping Analysis for Au-Ag NSs

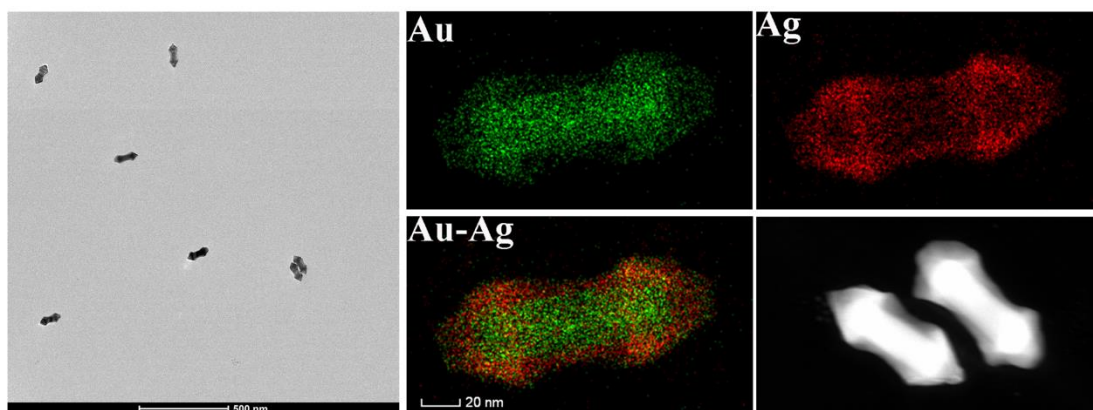

**Figure S4.** The TEM image and mapping analysis for Au-Ag NSs.

## 6. The Reproducibility of The NSs Enhanced RhB-PMMA Fluorophore Layer Imaging

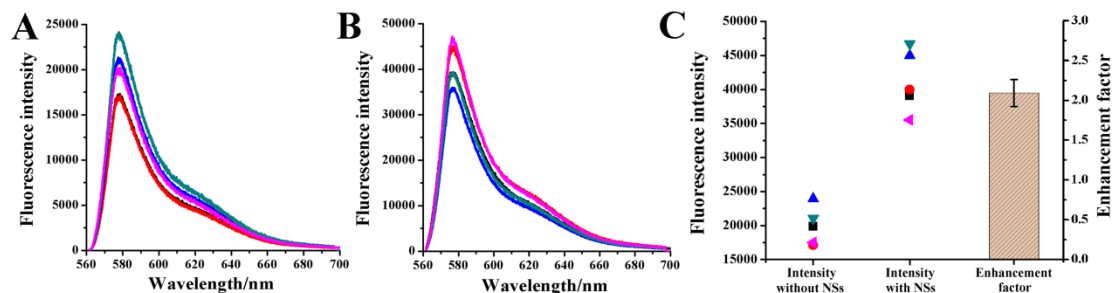

**Figure S5.** The intensity of RhB-PMMA layer imaging (A) without NSs enhancement, (B) with NSs enhancement, and (C) the reproducibility of enhancement factor.

## 7. The Normalized Intensity of RhB-PMMA Fluorophore Layer with Different Concentrations of Au-Ag NSs and The Image of RhB-PMMA Fluorophore Layer Modified with High Concentration of Au-Ag NSs

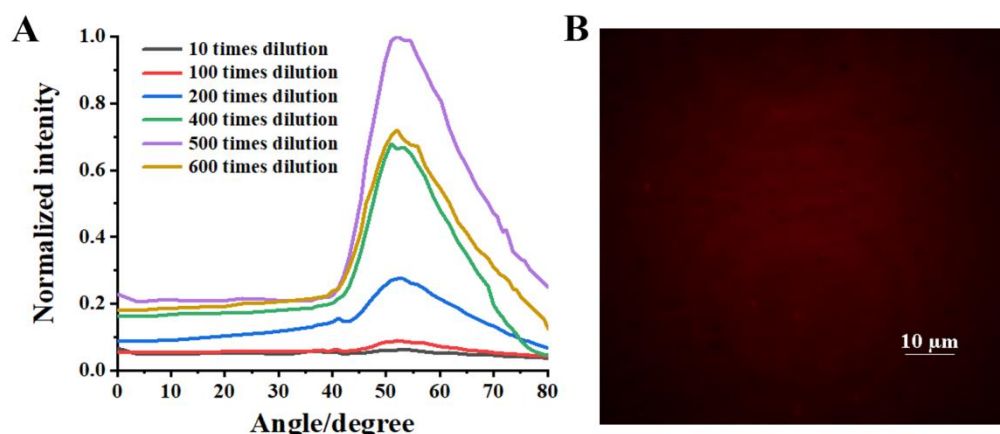

**Figure S6.** (A) The normalized intensity of RhB-PMMA fluorophore layer with different dilution times of Au-Ag NSs and (B) the image of RhB-PMMA fluorophore layer with high concentration of Au-Ag NSs (10 times dilution).

## 8. The excitation angular distribution and images of RhB dyeing cell

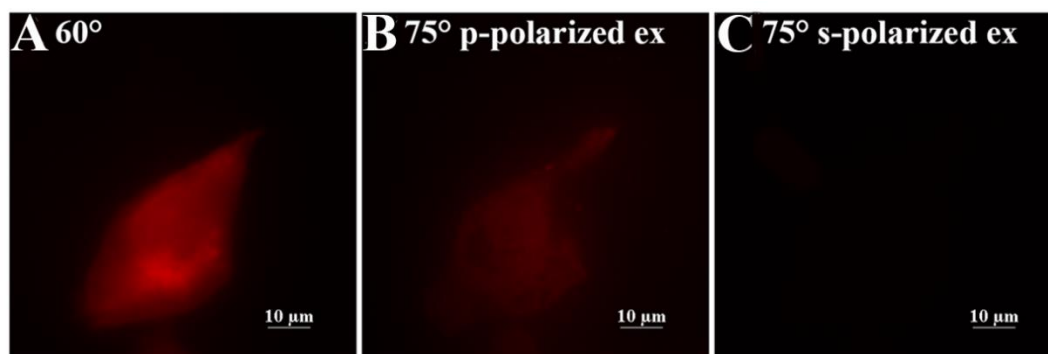

**Figure S7.** The images from (A) critical angle excitation, and the images from SPR excitation with (B) p- and (C) s-polarization for RhB dyeing cell without NPs.

## 9. The SBR of The RhB Dyeing Cells Imaging

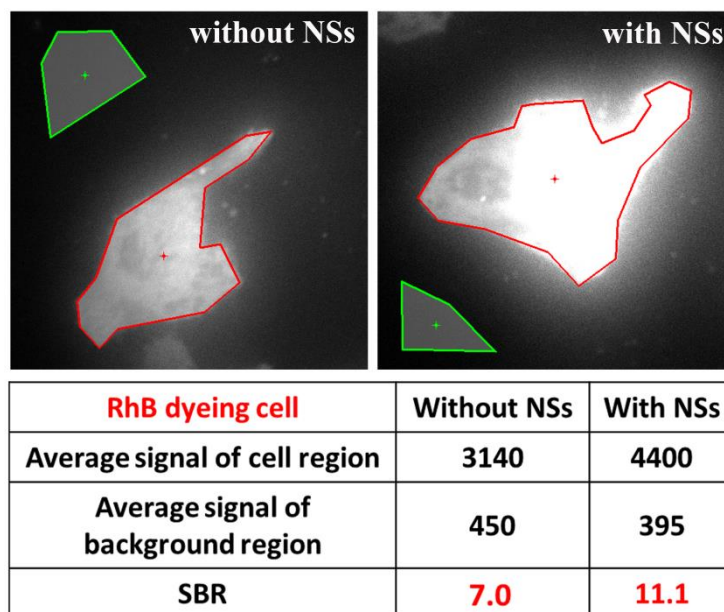

**Figure S8.** The ROI of RhB dyeing cell imaging without and with NSs, and the related average signal and SBR.

## 10. The SBR of The DiI Dyeing Cells Imaging

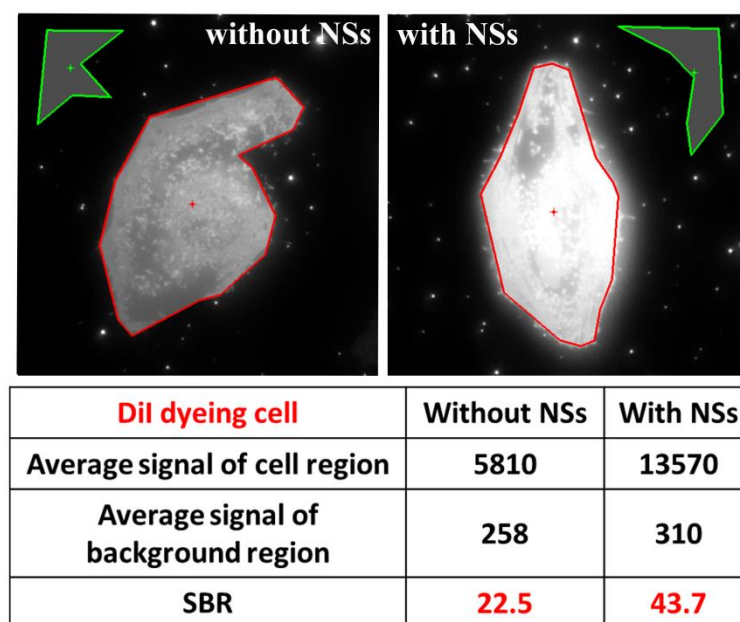

**Figure S9.** The ROI of DiI dyeing cell imaging without and with NSs, and the related average signal and SBR.

---

### 11. The Images Obtained from EPI Mode (Coverslip)

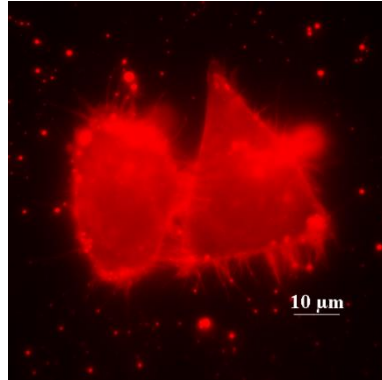

**Figure S10.** The image obtained from EPI mode on coverslip.
